# Supplementary material for: Knockout of CAFFEOYL-COA 3-O-METHYLTRANSFERASE 6/6L enhances the S/G ratio of lignin monomers and disease resistance in Nicotiana tabacum
Source: Front Plant Sci. 2023 Oct 5;14:1216702. doi: 10.3389/fpls.2023.1216702 (PMC10585270; doi:10.3389/fpls.2023.1216702)
Supplement: Supplementary file 1 [file Table_1.xlsx]

## Sheet: Sheet1
Supplementary Table S1:Root metabolic differentiates
Number	Compounds	Class	VIP	Fold_Change	Pvalue	Type
1	Proline	Amino acid	1.66917	0.844343	0.0495892	down
2	Trehalose-6-Phosphate	Carbohydrates	2.09704	0.893407	0.00919433	down
3	Maleamic acid	Organic acids	2.21431	0.827376	0.00517742	down
4	cis-Vaccenic acid	Lipids	1.77014	0.705551	0.0344298	down
5	Hyperoside	flavonoid	1.7164	0.599222	0.042098	down
6	Robinin	flavonoid	1.67217	0.700422	0.0499492	down
7	Cinnamic acid	Phenolic acid	2.22531	0.83658	0.00481092	down
8	Plantamajoside	Phenolic acid	2.13133	0.629132	0.00803057	down
9	Nicotine	Alkaloid	1.69706	0.849014	0.0471419	down
10	Cyanidin 3-(2G-glucosylrutinoside)	flavonoid	1.82249	0.702006	0.0294836	down
11	Polygalatenoside A	Others	2.39901	0.79028	0.00169593	down
12	Neolloydosin	Others	1.83924	0.838035	0.0273837	down
13	Sayaendoside	Others	2.22093	0.721047	0.00493178	down
14	Glutathione (oxidized)	Amino acid	2.13548	0.7916	0.00791612	down
15	Glyoxylate	Organic acids	1.74642	0.881479	0.039187	down
16	Glycerophosphocholine	Others	1.76531	0.885766	0.0356762	down
17	MALEIC ACID	Organic acids	1.91893	0.854933	0.0203235	down
18	3-O-Feruloylquinic acid	Phenolic acid	1.95647	0.679804	0.0177035	down
19	Malic acid	Organic acids	2.20613	0.824618	0.00540392	down
20	Cyanidin-3-O-galactoside	flavonoid	1.86235	0.56175	0.0247392	down
21	Icariside F2	Others	2.19348	0.658591	0.0059037	down
22	Xanthine	Nucleotide	1.87032	1.30136	0.0243031	up
23	4-Coumaroylcholine	Others	2.45308	2.08523	0.00116923	up
24	Caffeoylquinic acid	Phenolic acid	2.04154	1.16941	0.0118953	up
25	Benzoic acid	Organic acids	1.86285	1.21995	0.0254016	up
26	Caffeoyl putrescin	Phenolic acid	2.28974	1.75669	0.00332676	up
27	2-Hydroxyphenylacetic acid	Organic acids	2.02675	1.58308	0.0128183	up
28	Esculin	Coumarin	1.99772	1.72253	0.0145941	up
29	3-Hydroxycinnamic acid	Phenolic acid	1.91384	1.49878	0.0202072	up
30	N,N-Bis(2-Hydroxyethyl)Dodecylamine	Lipids	2.01556	1.09861	0.0132417	up
31	Alanine	Amino acid	1.68985	1.19791	0.0459763	up
32	quinic acid	Organic acids	1.97116	1.29856	0.0161926	up
