# Supplementary material for: Knockout of CAFFEOYL-COA 3-O-METHYLTRANSFERASE 6/6L enhances the S/G ratio of lignin monomers and disease resistance in Nicotiana tabacum
Source: Front Plant Sci. 2023 Oct 5;14:1216702. doi: 10.3389/fpls.2023.1216702 (PMC10585270; doi:10.3389/fpls.2023.1216702)
Supplement: Supplementary file 2 [file Table_2.xlsx]

## Sheet: Sheet1
Supplementary Table S2:Leaf metabolic differentiates
Number	Compounds	Class	VIP	Fold_Change	Pvalue	Type
1	Arginine	Amino acid	1.36481	0.791415	0.0497517	down
2	Phenylalanine	Amino acid	1.72298	0.7027	0.00348665	down
3	Uracil	Nucleotide	1.88774	0.728244	0.000976397	down
4	Choline	Others	1.39196	0.718722	0.0317325	down
5	Adenine	Nucleotide	1.51063	0.459885	0.0238513	down
6	Proline	Amino acid	1.45215	0.844037	0.0194795	down
7	Maleic acid	Organic acids	1.54266	0.921004	0.0110863	down
8	Maleamic acid	Organic acids	1.34785	0.82821	0.0324768	down
9	Scopoletin	Coumarin	1.78992	0.534658	0.00250778	down
10	Malic acid	Organic acids	1.35455	0.929066	0.029467	down
11	Scoparone	Coumarin	1.40636	0.871795	0.0463359	down
12	Cinnamic acid	Phenolic acid	1.72654	0.782913	0.0029907	down
13	Triphenylphosphate	Others	1.43421	0.935274	0.0392087	down
14	N,N-Dimethyldodecylamine N-oxide	Lipids	2.04878	0.903183	0.00042466	down
15	LPC 16:0	Lipids	1.98899	0.474772	0.000205678	down
16	N,N-Bis(2-Hydroxyethyl)Dodecylamine	Lipids	1.71023	0.919978	0.014565	down
17	3-Aminobutanoic acid	Organic acids	1.39507	0.7167	0.0312785	down
18	Methionine	Amino acid	1.37843	0.768419	0.0292565	down
19	Tyrosine	Amino acid	1.85827	0.6798	0.000959514	down
20	Leucine	Amino acid	1.70792	0.659504	0.00343616	down
21	Histidine	Amino acid	1.62763	0.583522	0.00753096	down
22	Adenosine	Nucleotide	1.64068	0.813478	0.00546708	down
23	Palmitic acid	Lipids	1.49291	0.781114	0.0144904	down
24	Xanthine	Nucleotide	2.013	0.72363	0.000190533	down
25	Benzoic acid	Organic acids	1.6968	0.74274	0.00437833	down
26	4-Coumaric acid	Phenolic acid	1.53437	0.890194	0.015969	down
27	Pantothenic acid	Organic acids	1.7266	0.729075	0.00603404	down
28	Stearic acid	Lipids	1.76244	0.895168	0.00327429	down
29	Linoleic acid	Lipids	1.78493	0.612386	0.00180074	down
30	Campesterol	Terpenoids	1.73212	0.795537	0.00642847	down
31	Targinine	Amino acid	1.92515	0.70489	0.000435201	down
32	Arachidic acid	Lipids	1.33439	0.740507	0.0356302	down
33	Linolenic acid	Lipids	1.80309	0.450483	0.00152476	down
34	Dibutyl Phthalate	Others	1.96126	0.54391	0.000362313	down
35	9-KODE	Lipids	1.78365	0.751591	0.00176503	down
36	9,10-DiHOME	Lipids	1.30548	0.784891	0.0375102	down
37	Isoscopoletin	flavonoid	1.40742	0.791575	0.0307466	down
38	MGMG 16:3	Lipids	1.70695	0.455693	0.00338261	down
39	Methioninesulfoxide	Others	1.39722	0.773039	0.0298234	down
40	LPC 18:1	Lipids	1.4177	0.404041	0.0260409	down
41	LPC 18:3	Lipids	1.64951	0.333804	0.00567725	down
42	Coumaroyl quinic acid	Phenolic acid	1.52406	1.23177	0.0156702	up
43	Adenosine 5'-monophosphate	Nucleotide	1.90461	2.08469	0.000579003	up
44	2'-Deoxyguanosine 5'-monophosphate	Nucleotide	1.62715	1.64767	0.00770627	up
45	Glycerophosphocholine	Others	1.63599	1.28782	0.0062563	up
46	lactose	Carbohydrates	1.45262	1.39363	0.0262597	up
47	Lauric acid	Lipids	1.57339	1.17428	0.0158547	up
48	Epiandrosterone	Terpenoids	1.56166	1.50661	0.0133417	up
49	Asiatic acid	Terpenoids	1.54063	1.42091	0.0326573	up
50	Soyasaponin Bb	Terpenoids	1.48245	1.70277	0.0270217	up
51	Licoagroside B	Others	1.57524	1.30653	0.0115556	up
52	Monoolein	Lipids	1.46269	1.12842	0.0431084	up
53	PI(18:1/9-HODE)	Lipids	1.31232	1.16931	0.0391205	up
54	Icariside F2	Others	1.54848	1.49551	0.0120022	up
55	FA 18:2+2O	Lipids	1.3023	1.16836	0.0486438	up
56	alpha-D-Glucose-1,6-diphosphate	Carbohydrates	1.43409	1.59307	0.0220958	up
